# Supplementary material for: Triamidoamine-supported zirconium: hydrogen activation, Lewis acidity, and rac-lactide polymerization
Source: Royal Society of Chemistry journal article supplement (doi:10.1039/c6ra15617g), 2016-01-01
Supplement: c6ra15617g1.pdf [file c6ra15617g1.pdf]

*Supplementary Information for*

---

**Triamidoamine-Supported Zirconium: Hydrogen Activation, Lewis Acidity,  
and *rac*-Lactide Polymerization**

Sarah E. Leshinski, Craig A. Wheaton, Hongsui Sun, Andrew J. Roering, Joseph M. Tanski,  
Daniel J. Fox, Paul G. Hayes,\* and Rory Waterman\*

*Department of Chemistry, University of Vermont, Cook Physical Sciences, Burlington, Vermont,  
05405, United States*

*Department of Chemistry and Biochemistry, University of Lethbridge, 4401 University Drive,  
Lethbridge, AB, Canada T1K 3M4.*

p.hayes@uleth.ca      rory.waterman@uvm.edu

**Table of Contents**

---

Figures S1 – S2: Plots for 100 equiv. of lactide substrate.

Figures S3 – S4: Plots for 25 equiv. of lactide substrate.

Table S1: Conversion data.

Figures S5 – S8: NMR spectra of polymerization reactions.

Figures S9 – S12: NMR spectra of H2 and D2 reactions with **1**.

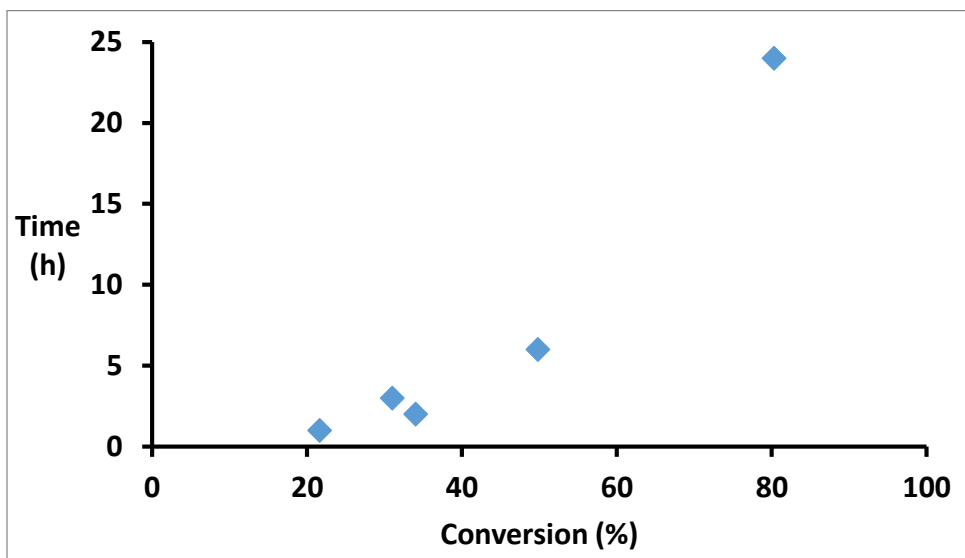

**Figure S1.** Plot of time vs. conversion for polymerization of 100 equiv *rac*-LA using **1** as initiator.

[LA]<sub>0</sub> = 0.5 M, toluene, T = 70 °C.

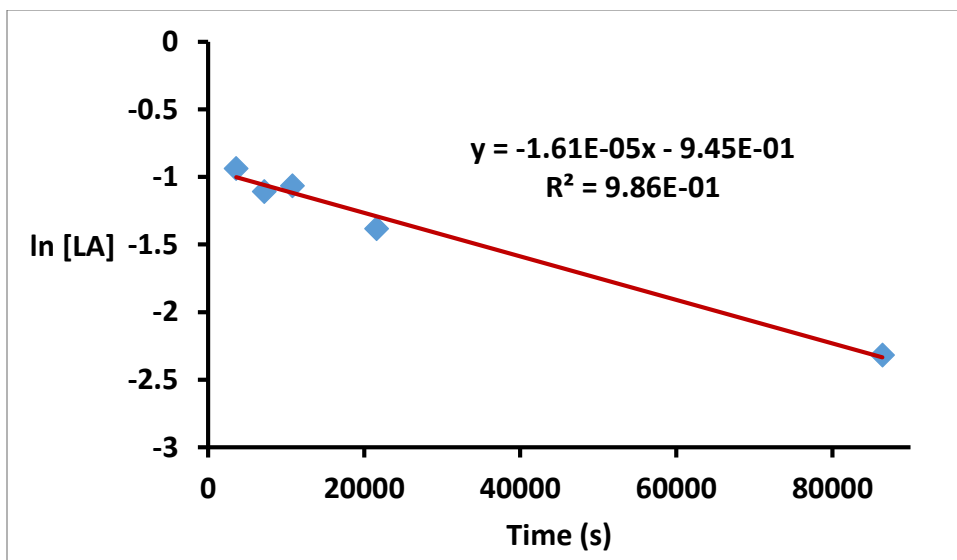

**Figure S2.** Plot of ln[LA] versus time for polymerization of 100 equiv *rac*-LA using **1** as initiator.

[LA]<sub>0</sub> = 0.5 M, toluene, T = 70 °C.

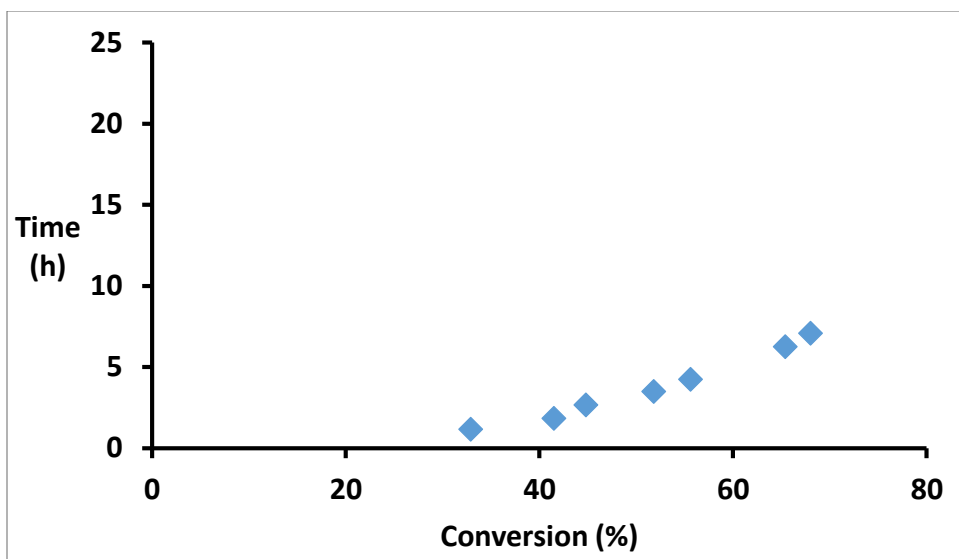

**Figure S3.** Plot of time vs. conversion for polymerization of 25 equiv *rac*-LA using **1** as initiator.  $[LA]_0 = 0.5$  M, toluene,  $T = 70$  °C.

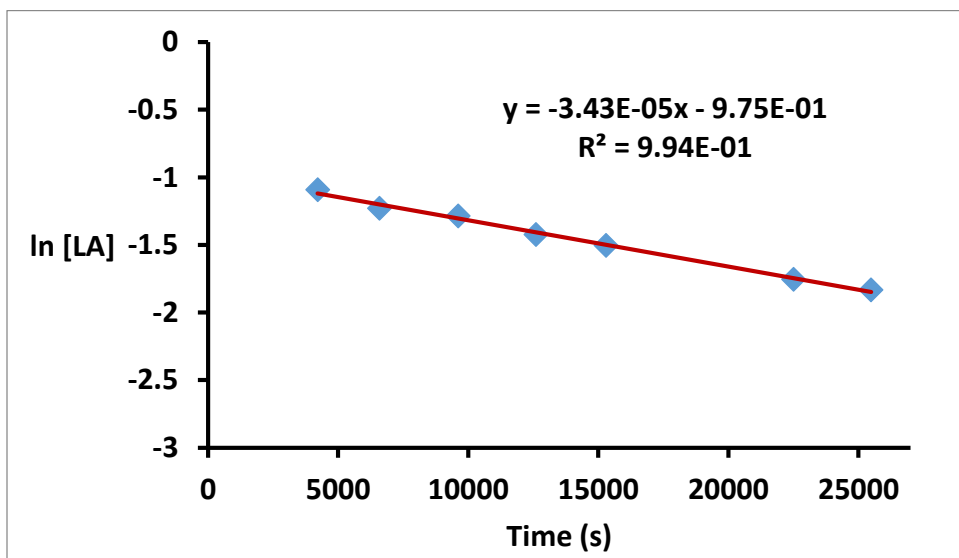

**Figure S4.** Plot of  $\ln[LA]$  versus time for polymerization of 25 equiv *rac*-LA using **1** as initiator.  $[LA]_0 = 0.5$  M, toluene,  $T = 70$  °C.

**Table S1.** Conversion data for PLA samples prepared using different concentrations of **1** as initiator.<sup>a</sup>

| [LA] <sub>0</sub> /[Cat] | [Cat] | Time (h) | Conv. (%) |
|--------------------------|-------|----------|-----------|
| 25                       | 0.020 | 1.17     | 32.9      |
| 25                       | 0.020 | 1.83     | 41.5      |
| 25                       | 0.020 | 2.67     | 44.8      |
| 25                       | 0.020 | 3.5      | 51.8      |
| 25                       | 0.020 | 4.25     | 55.6      |
| 25                       | 0.020 | 6.25     | 65.4      |
| 25                       | 0.020 | 7.08     | 68        |
| 100                      | 0.005 | 1        | 21.6      |
| 100                      | 0.005 | 2        | 34        |
| 100                      | 0.005 | 3        | 31        |
| 100                      | 0.005 | 6        | 49.8      |
| 100                      | 0.005 | 24       | 80.3      |

<sup>a</sup> [LA]<sub>0</sub> = 0.5 M, toluene, 70 °C

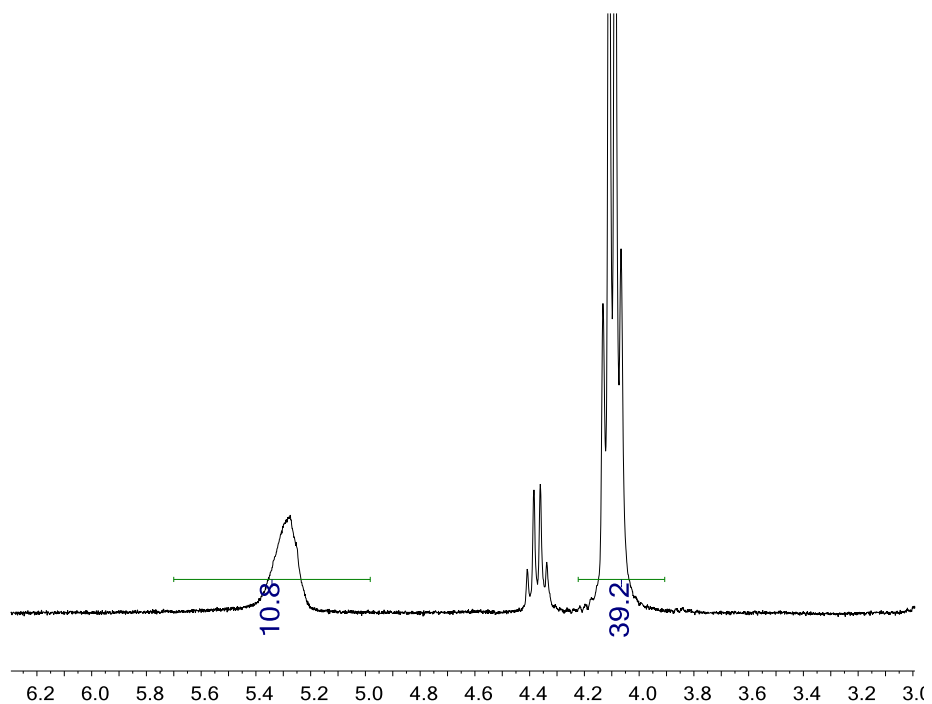

**Figure S5.** <sup>1</sup>H NMR spectrum of the lactide/PLA methine region during lactide polymerization using **1** as initiator ([LA]<sub>0</sub>/[**1**] = 100, T = 70 °C, t = 1h, conversion = 21.6%).

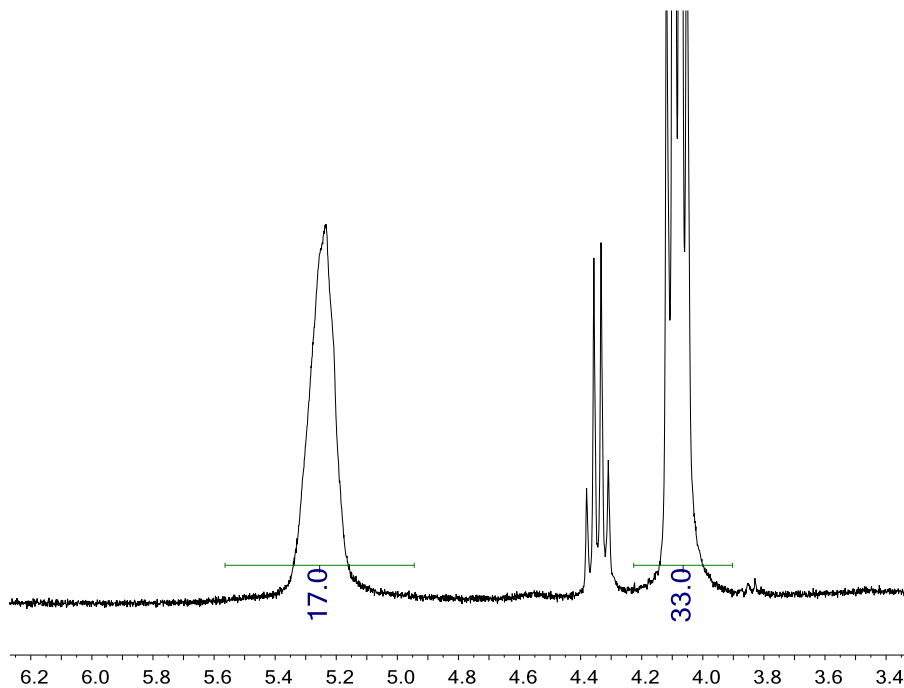

**Figure S6.** <sup>1</sup>H NMR spectrum of the lactide/PLA methine region during lactide polymerization using **1** as initiator ( $[LA]_0/[1] = 100$ ,  $T = 70\text{ }^\circ\text{C}$ ,  $t = 2\text{h}$ , conversion = 34%).

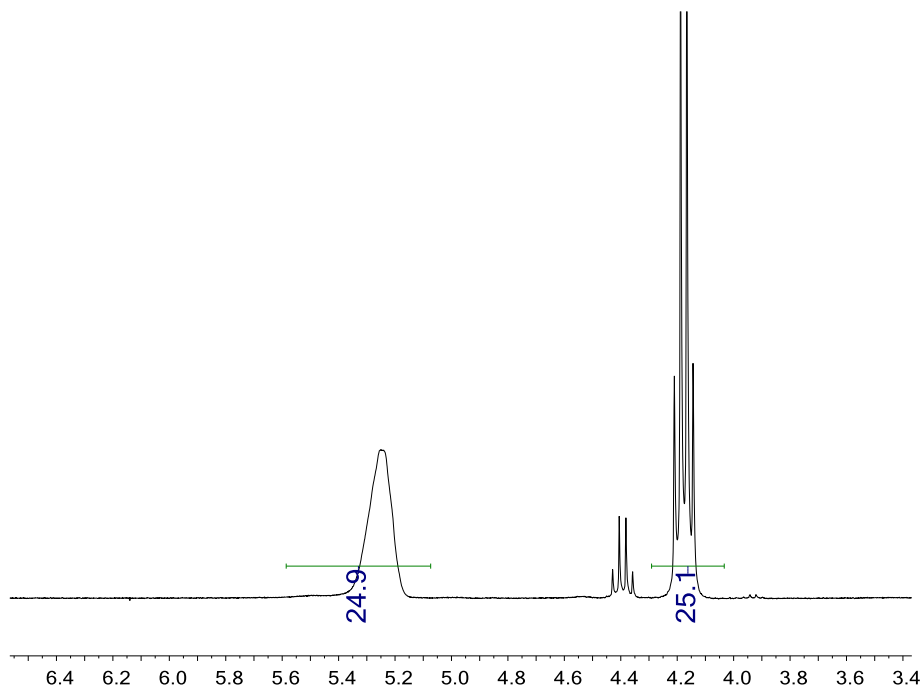

**Figure S7.** <sup>1</sup>H NMR spectrum of the lactide/PLA methine region during lactide polymerization using **1** as initiator ( $[LA]_0/[1] = 100$ ,  $T = 70\text{ }^\circ\text{C}$ ,  $t = 6\text{h}$ , conversion = 49.8%).

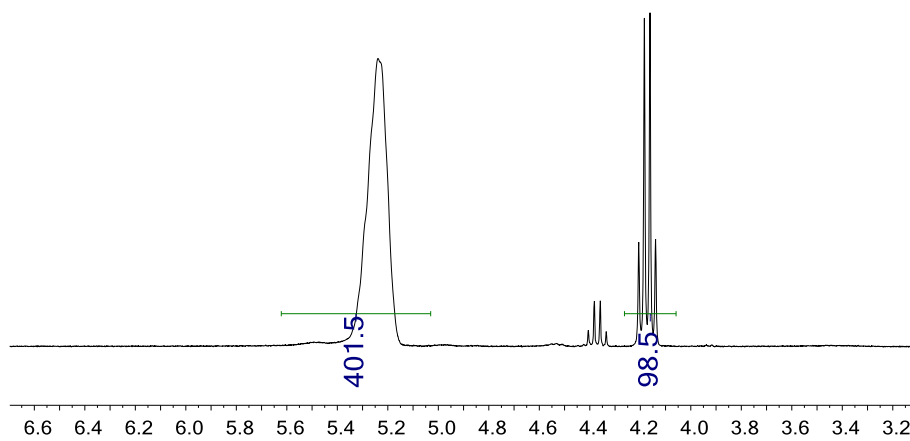

**Figure S8.**  $^1\text{H}$  NMR spectrum of the lactide/PLA methine region during lactide polymerization using **1** as initiator ( $[\text{LA}]_0/[\mathbf{1}] = 100$ ,  $T = 70\text{ }^\circ\text{C}$ ,  $t = 24\text{h}$ , conversion = 80.3%).

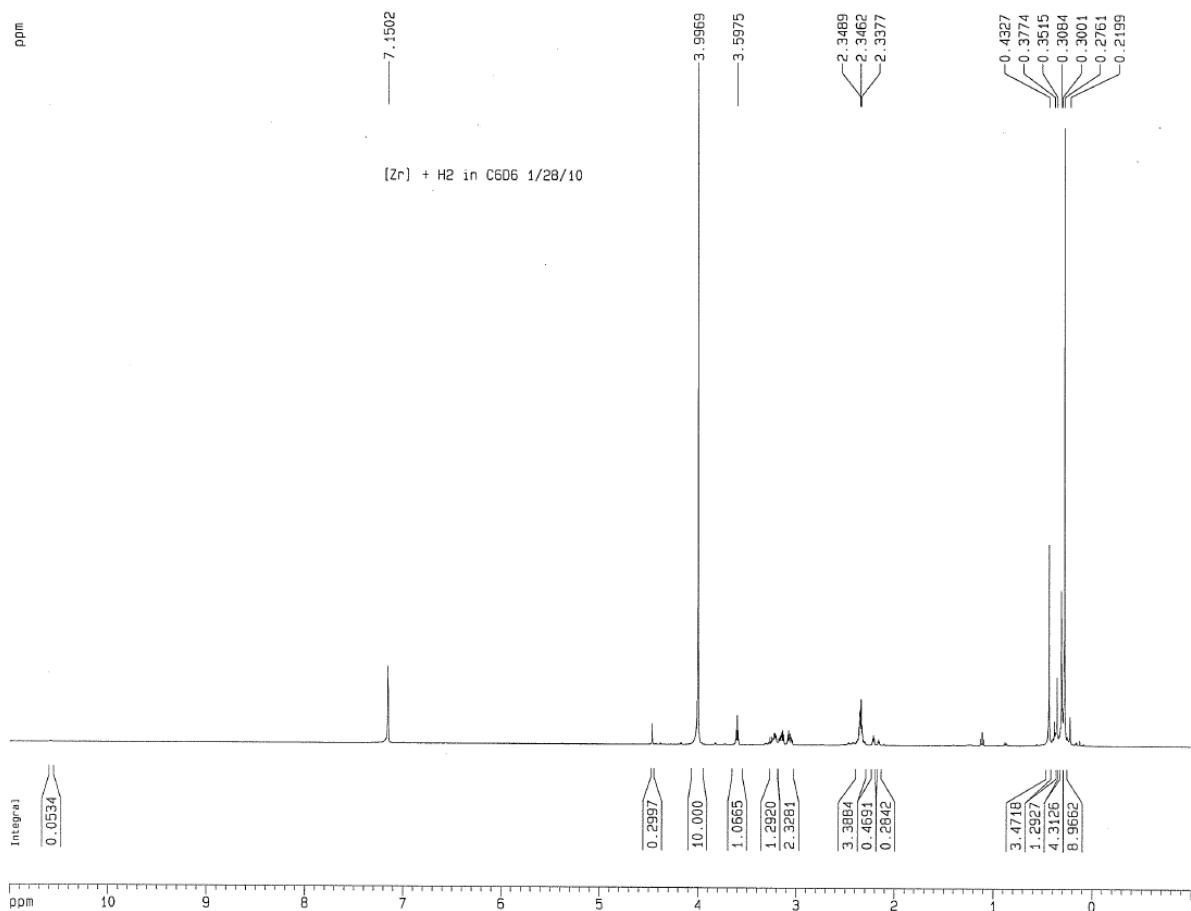

**Figure S9.** Example <sup>1</sup>H NMR spectrum of a benzene-*d*<sub>6</sub> solution of **1** under H<sub>2</sub> in the presence of ferrocene.

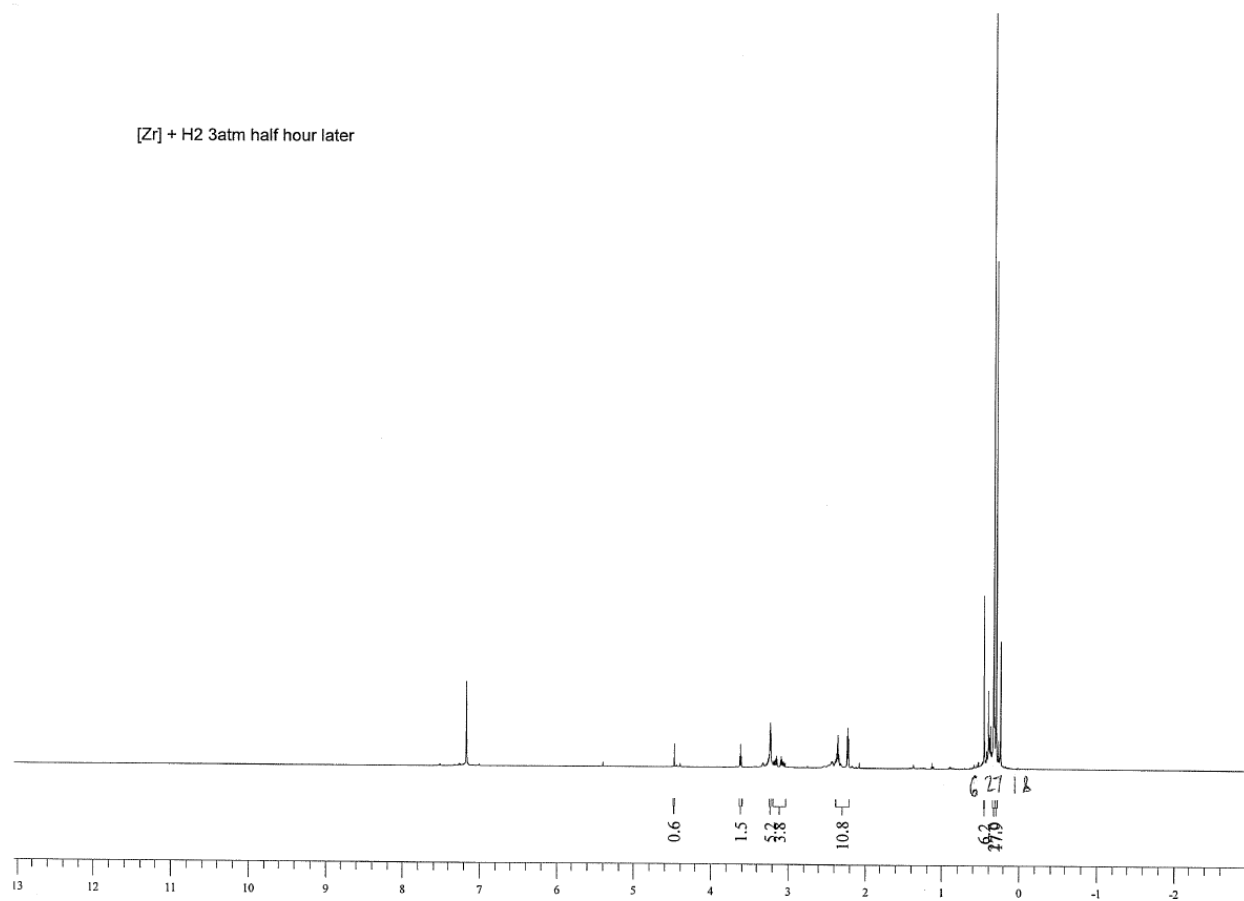

**Figure S10.** Example <sup>1</sup>H NMR spectrum of a benzene-*d*<sub>6</sub> solution of **1** under H<sub>2</sub> without ferrocene.



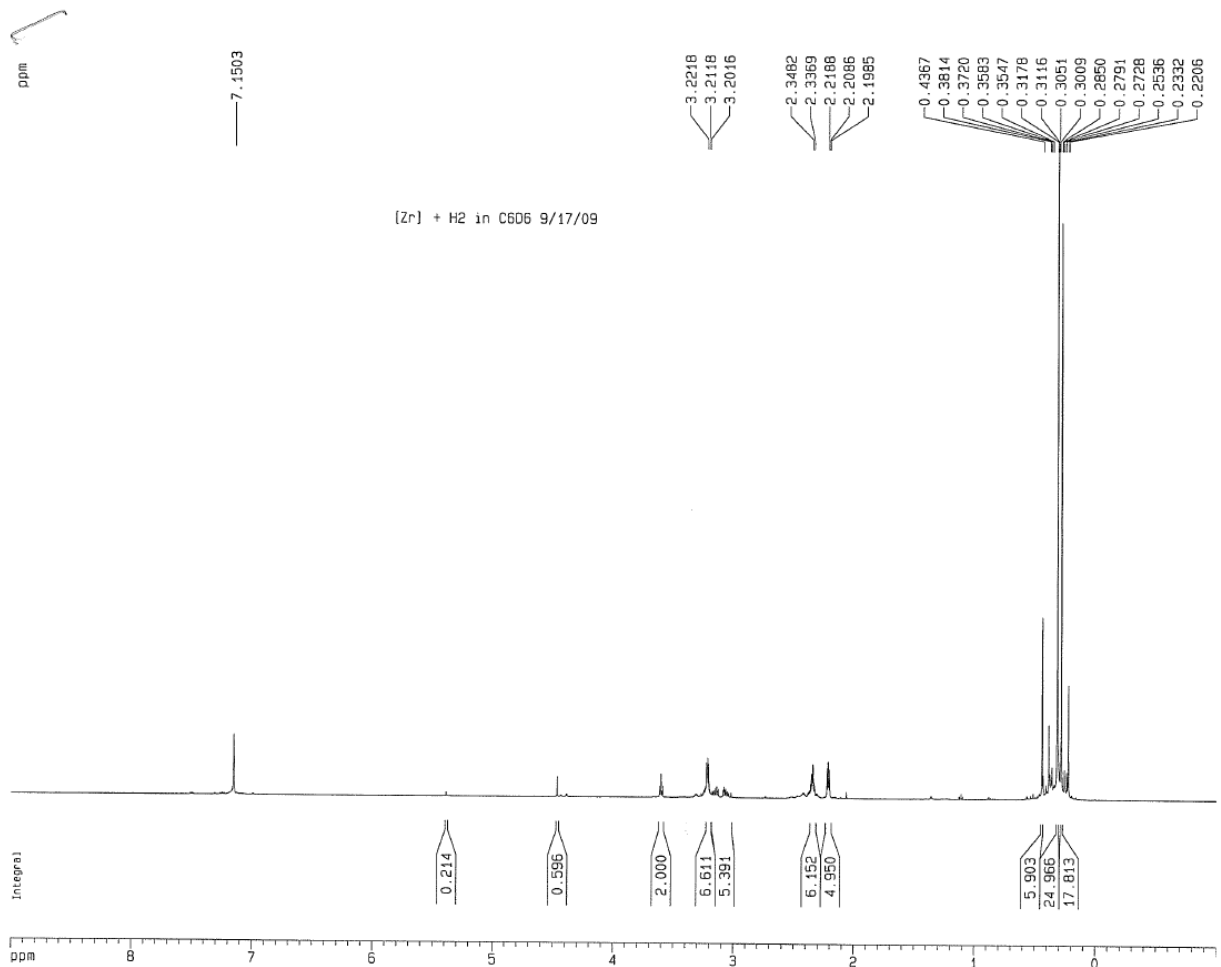

**Figure S11.** Expanded aromatic and aliphatic region of a <sup>1</sup>H NMR spectrum (different from Figure S10) of a benzene-*d*<sub>6</sub> solution of **1** under H<sub>2</sub> without ferrocene.

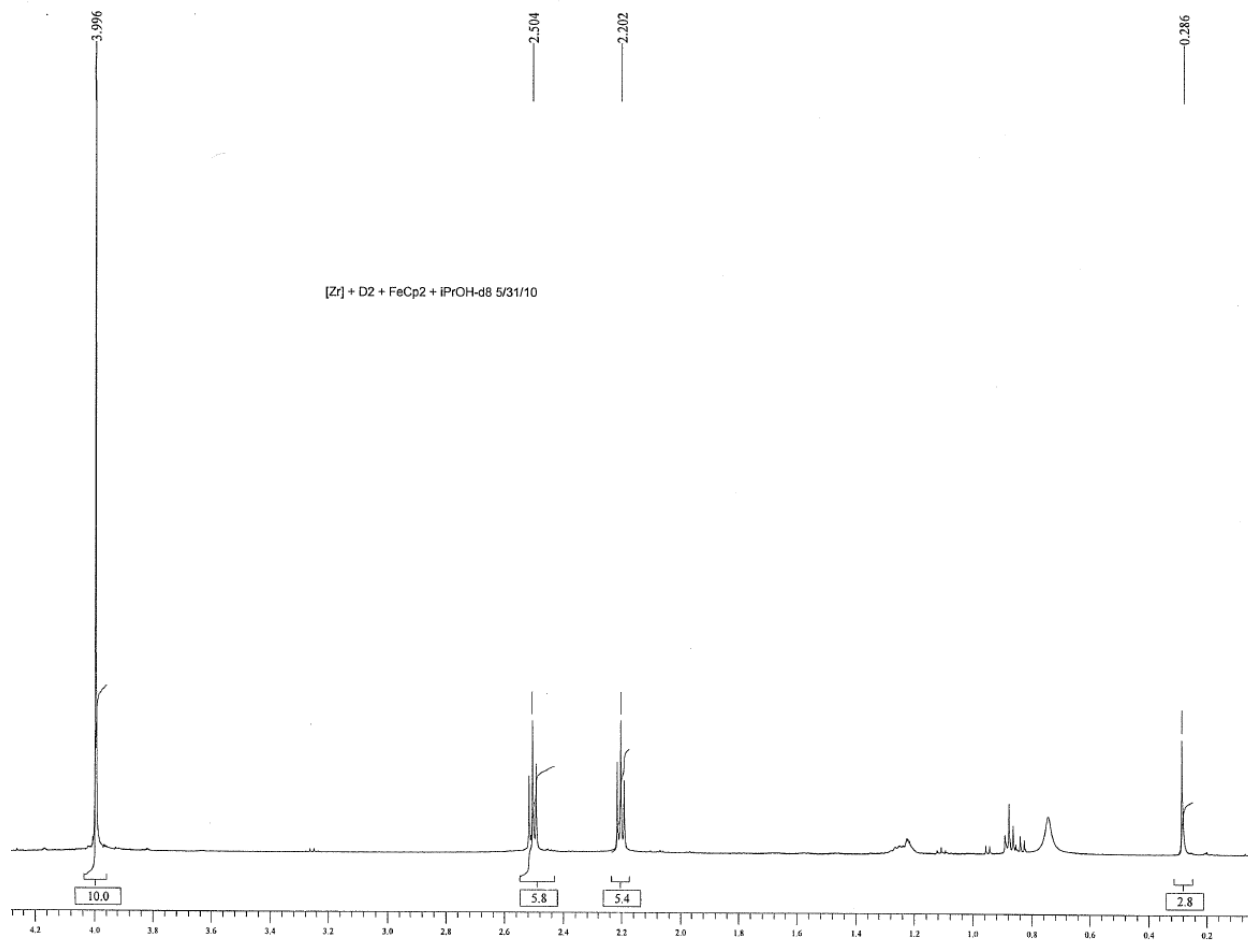

**Figure S12.** Compound **2** can be a source of  $N(\text{CH}_2\text{CH}_2\text{NHSiMe}_3)\text{-}d_n$  by reaction of **2** with isopropanol. The  $^1\text{H}$  NMR spectrum of a benzene- $d_6$  solution of  $N(\text{CH}_2\text{CH}_2\text{NHSiMe}_3)\text{-}d_n$  includes an internal ferrocene integration standard. This reaction is not reported in the main article text because the purification of product is sufficiently tedious to make isolated yields highly variable.
